# Supplementary material for: Dual modulation of blue-fluorescent carbon dots for simultaneous detection of topotecan and pantoprazole
Source: Royal Society of Chemistry journal article supplement (doi:10.1039/d4ay00394b), 2024-01-01
Supplement: d4ay00394b1.pdf [file d4ay00394b1.pdf]

## Supplementary Data file

### Dual Modulation of Blue-Fluorescent Carbon Dots for Simultaneous Detection of Topotecan and Pantoprazole

Ashraf M. Mahmoud<sup>a</sup>, Yahya S. Alqahtani<sup>a</sup>, Mohamed M. El-Wakil<sup>b</sup>, Al-Montaser Bellah

H. Ali<sup>b\*</sup>

<sup>a</sup> Department of Pharmaceutical Chemistry, College of Pharmacy, Najran University, Najran,  
Saudi Arabia

<sup>b</sup> Department of Pharmaceutical Analytical Chemistry, Faculty of Pharmacy, Assiut University,  
Assiut, Egypt.

\*e-mail: Almontaser\_bellah@aun.edu.eg, Almontaser\_bellah@yahoo.com

## Measurement of fluorescence quantum yield of B@NCDs

The quantum yield (QY) of B@NCDs was calculated according to the following equation using quinine sulfate (QS) as a reference in 0.1 M H<sub>2</sub>SO<sub>4</sub> (QY = 54 %). By measuring the absorbance (less than 0.05) and emission spectra of a certain concentration of B@NCDs and quinine sulfate at the same excitation wavelength at 360 nm, the absorbance and fluorescence integral area were substituted into the following formula:

$$\phi_{B@NCDs} = \phi_{QS} \times \frac{F_{B@NCDs}}{F_{QS}} \times \frac{A_{QS}}{A_{B@NCDs}} \times \frac{\eta_{B@NCDs}}{\eta_{QS}}$$

$\Phi_{B@NCDs}$  represents the quantum yield of B@NCDs,  $\phi_{QS}$  represents the quantum yield of QS,  $F_{B@NCDs}$  is the fluorescence intensity of B@NCDs,  $F_{QS}$  is the fluorescence intensity of quinine sulphate, A refers to the absorbance value and  $\eta$  refers to the refractive index of the solvent (distilled water). The synthesized B@NCDs were dissolved in distilled water ( $\eta = 1.33$ ) and quinine sulfate was dissolved in 0.1 M H<sub>2</sub>SO<sub>4</sub> ( $\eta = 1.33$ ).

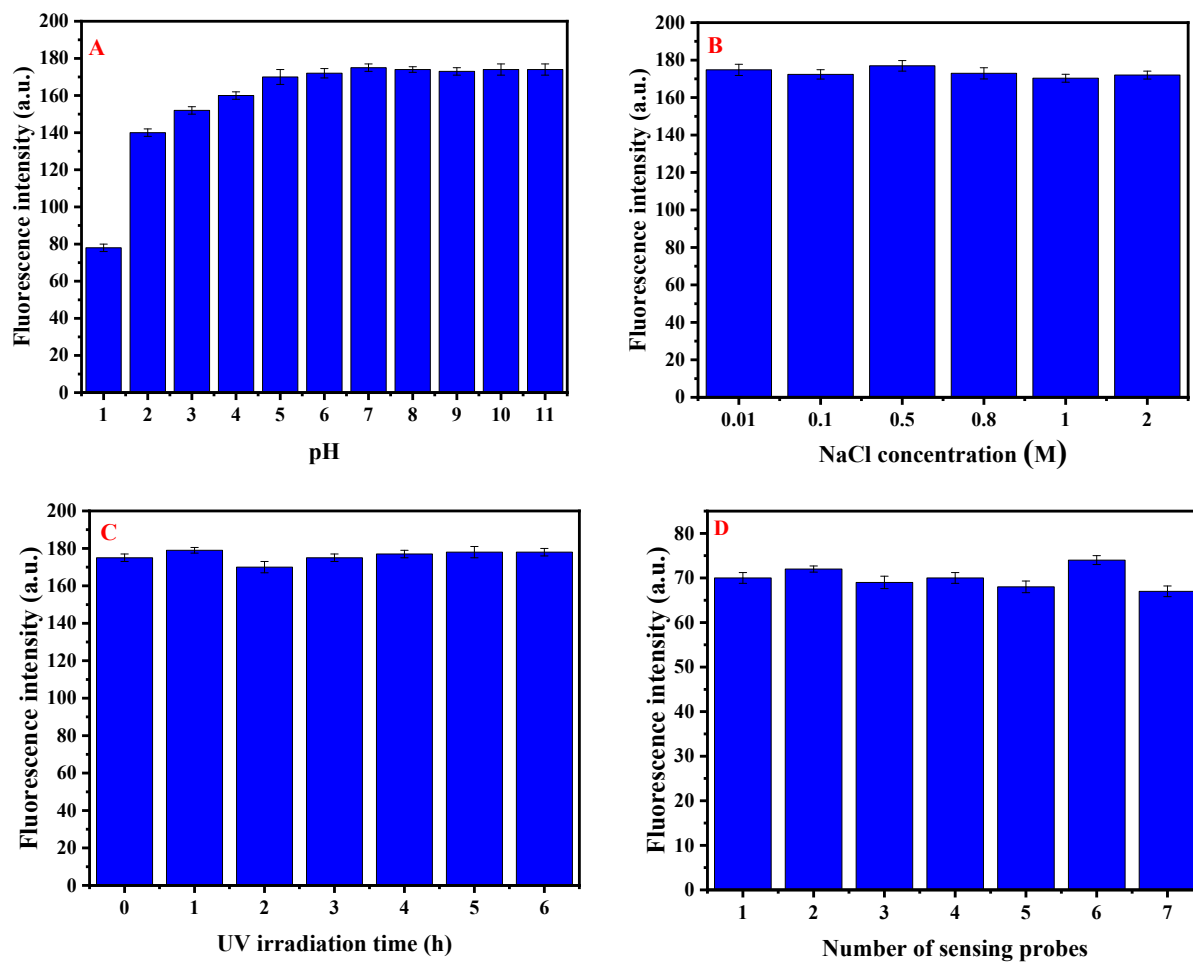

**Fig. S1.** Stability of the fluorescence response of B@NCDs under various conditions: (A) Effect of pH (1.0 – 11.0), (B) Effect of NaCl concentration (0.01 – 2.0 M), and (C) Effect of UV irradiation time (0 – 6 hrs). (D) reproducibility of the B@NCDs sensing probe for the detection of PNT.

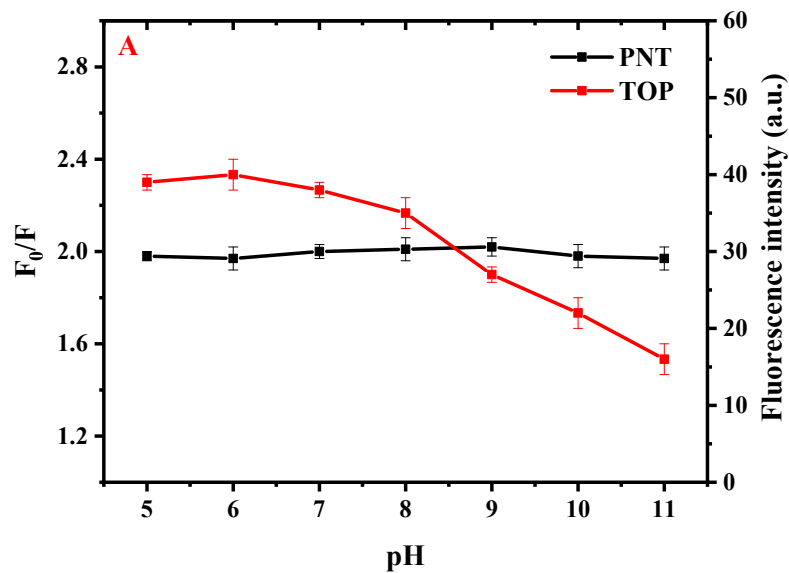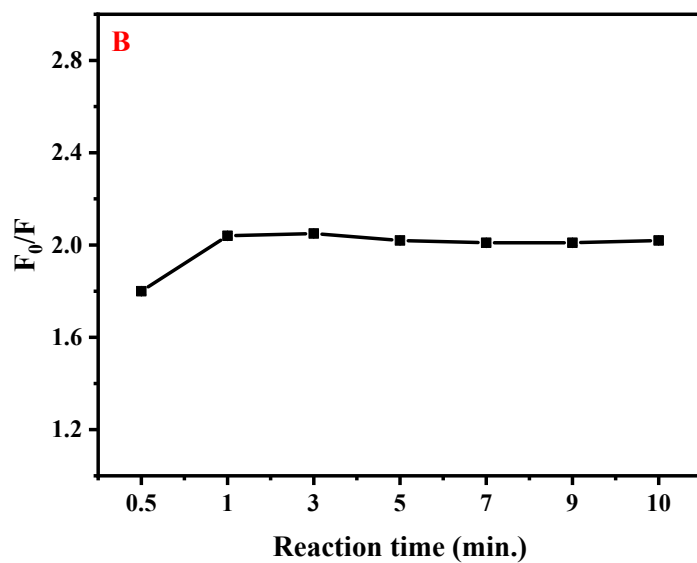

**Fig. S2.** Influence of (A) pH (5.0 – 11.0) on fluorescence intensity ratio  $F_0/F$  of B@NCDs for detection of PNT and fluorescence intensity of TOP, and (B) reaction time (0.5 – 10.0 min.) on fluorescence intensity ratio  $F_0/F$  of B@NCDs for detection of PNT.

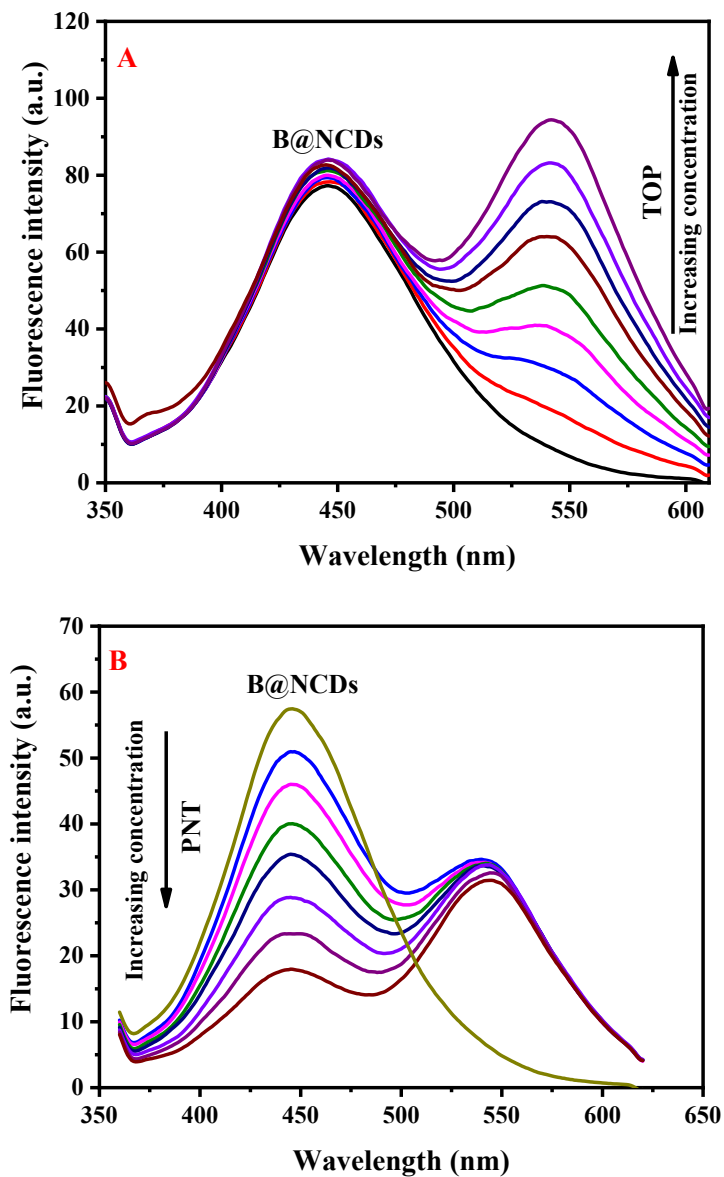

**Fig. S3.** The influence of different concentrations of (A) TOP ( $0.005 - 0.14 \mu\text{g mL}^{-1}$ ) at 545 nm in presence of PNT and (B) PNT ( $1.0 - 80.0 \mu\text{g mL}^{-1}$ ) on the fluorescence emission of B@NCDs at 447 nm in presence of TOP.

**Table S1.** Comparison of this work with other reported methods for the detection of TOP.

| <b>Method</b>                           | <b>Linear range<br/>(<math>\mu\text{g mL}^{-1}</math>)</b> | <b>LOD (<math>\mu\text{g mL}^{-1}</math>)</b> | <b>Ref.</b>      |
|-----------------------------------------|------------------------------------------------------------|-----------------------------------------------|------------------|
| Electrochemical (SWV)                   | 275 – 366,000                                              | 123.5                                         | 1                |
| Electrochemical (SWV)                   | 320 – 366,000                                              | 137.3                                         | 2                |
| Electrochemical (DPV)                   | 46 – 7320                                                  | 10.1                                          | 3                |
| Electrochemical (DPV)                   | 320 – 41,175                                               | 169.3                                         | 4                |
| Reversed-phase liquid<br>chromatography | 0.00025 – 0.08                                             | -----                                         | 5                |
| HPLC                                    | 0.0002 – 0.05                                              | -----                                         | 6                |
| LC/tandem MS                            | 0.001 – 0.4                                                | -----                                         | 7                |
| Fluorometric                            | 0.005 – 0.140                                              | 0.0016                                        | <b>This work</b> |

**Table S2.** Comparison of this work with other reported methods for the detection of PNT.

| Method                                           | Linear range<br>( $\mu\text{g mL}^{-1}$ ) | LOD ( $\mu\text{g mL}^{-1}$ ) | Ref.             |
|--------------------------------------------------|-------------------------------------------|-------------------------------|------------------|
| Fluorescence (Terbium-1,10-phenanthroline-AgNPs) | 43.24 – 4324                              | 31.13                         | 8                |
| Fluorescence (SDS)                               | 0.2 – 3.0                                 | 0.02                          | 9                |
| Electrochemical (DPV)                            | 2594 – 345,920                            | 172.96                        | 10               |
| Electrochemical (SWAdSV)                         | 3891.6 – 86,480                           | 389.16                        | 11               |
| Electrochemical (SWAdSV)                         | 65 – 10,909                               | 20.76                         | 12               |
| Electrochemical (Potentiometric)                 | 4324 – 4,756,400                          | 2983.5                        | 13               |
| HPLC                                             | 0.03 – 25.00                              | 0.011                         | 14               |
| HPLC                                             | 0.01 – 50                                 | -----                         | 15               |
| Fluorometric                                     | 1.0 – 80.0                                | 0.36                          | <b>This work</b> |

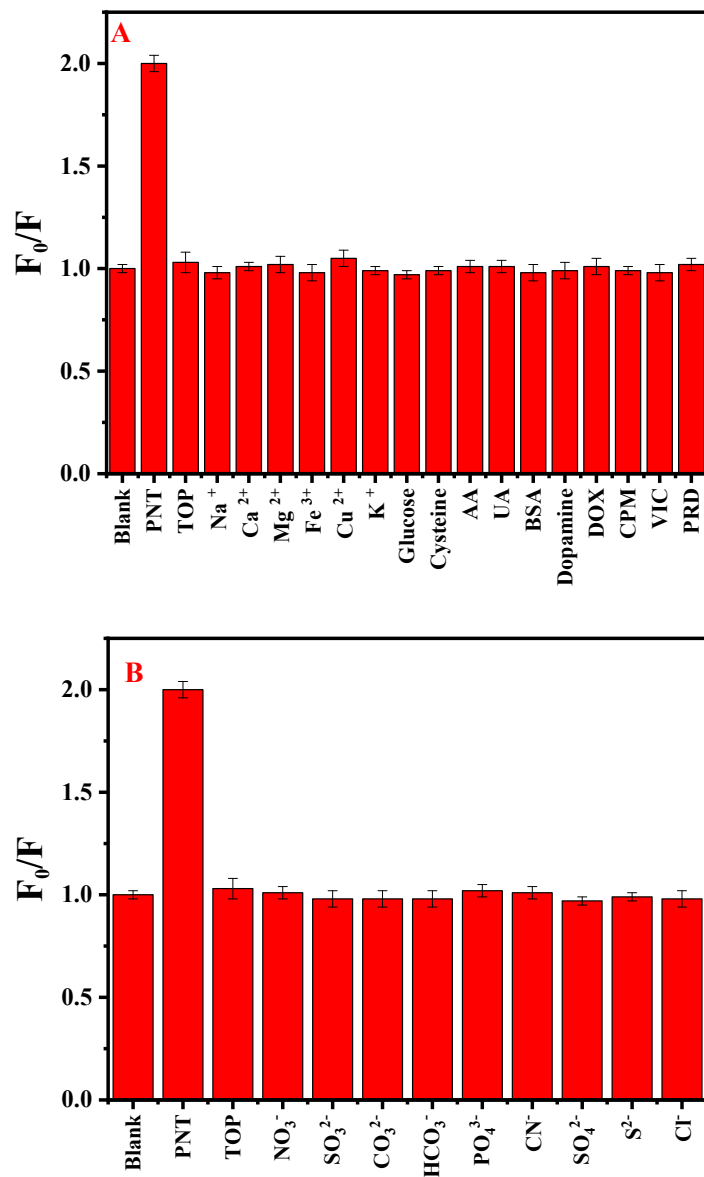

**Fig. S4.** Relative fluorescence intensity after incorporation of (A) different cations, biological compounds and co-administered drugs ( $1.0 \text{ mg mL}^{-1}$ ) and (B) different anions ( $1.0 \text{ mg mL}^{-1}$ ) to the prepared B@NCDs.



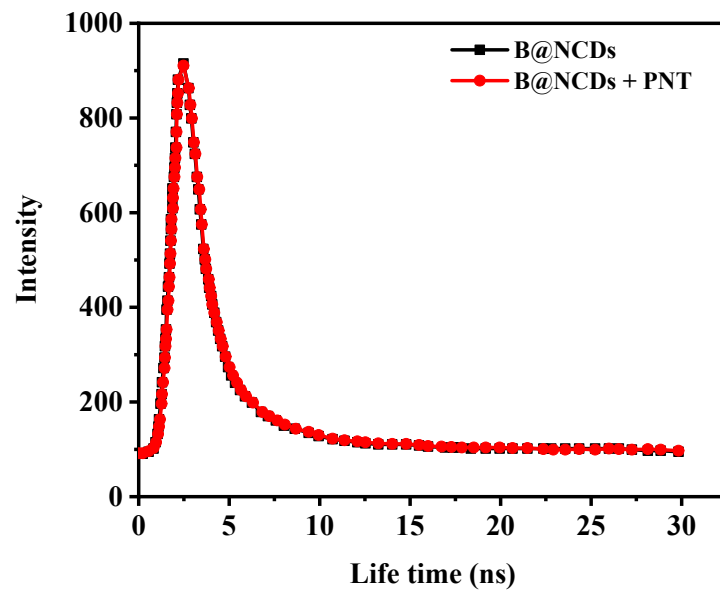

**Fig. S5.** Fluorescence lifetime of B@NCDs before and after addition of PNT.

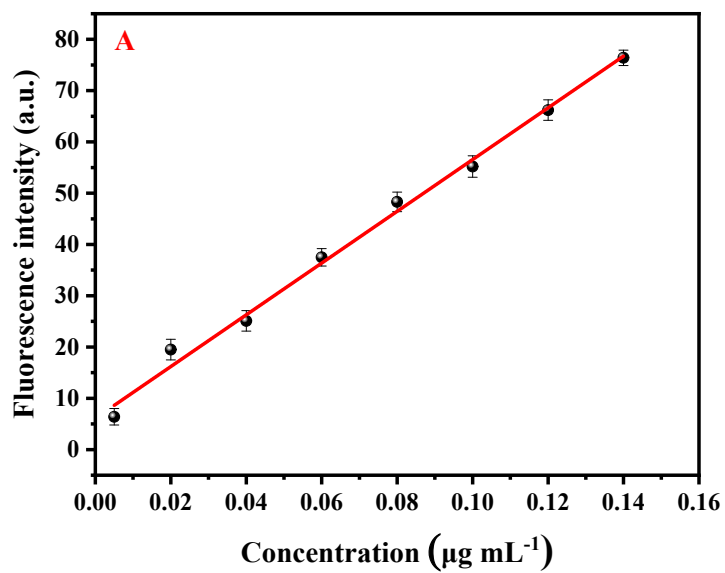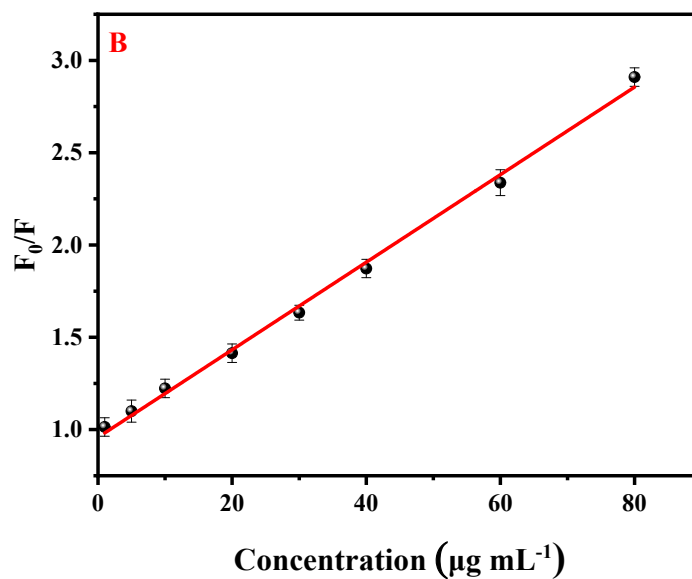

**Fig. S6.** (A) Plot of corrected fluorescence intensity versus concentration of TOP (0.005 – 0.14  $\mu\text{g mL}^{-1}$ ). (B) Plot of ( $F_0/F$ ) versus concentration of PNT (1.0 – 80.0  $\mu\text{g mL}^{-1}$ ).

**Table S3.** Comparison of the pharmacokinetics of TOP alone and in combination with PNT following intravenous administration in rabbits ( $n = 6$ ).

| <b>Parameters</b>                             | <b>TOP</b>     | <b>TOP in presence of PNT</b> |
|-----------------------------------------------|----------------|-------------------------------|
| $C_{\max}$ (ng mL <sup>-1</sup> )             | 48.4 ± 2.07    | 60.2 ± 5.12*                  |
| $t_{1/2\alpha}$ (h)                           | 0.01 ± 0.002   | 0.008 ± 0.003*                |
| $t_{1/2\beta}$ (h)                            | 6.65 ± 0.83    | 9.24 ± 0.15*                  |
| $V_c$ (L kg <sup>-1</sup> )                   | 0.0002 ± 0.005 | 0.0001 ± 0.002                |
| $V_p$ (L kg <sup>-1</sup> )                   | 0.0025 ± 0.004 | 0.0021 ± 0.003*               |
| $k_{el}$ (h <sup>-1</sup> )                   | 1.29 ± 0.036   | 1.26 ± 0.095                  |
| CL (L kg <sup>-1</sup> h <sup>-1</sup> )      | 0.0003 ± 0.005 | 0.0002 ± 0.002                |
| MRT (h)                                       | 9.39 ± 0.52    | 13.1 ± 0.98*                  |
| AUC <sub>0-12</sub> (ng hr mL <sup>-1</sup> ) | 245 ± 25.14    | 353 ± 23.21*                  |
| AUC <sub>0-∞</sub> (ng hr mL <sup>-1</sup> )  | 344 ± 13.72    | 596 ± 15.23*                  |

\*Indicates statistically significant differences between parameters values of TOP and TOP/PNT ( $p < 0.05$ ).

## References

1. A. Mohammadian, M. Ebrahimi and H. Karimi-Maleh, *J Mol Liq*, 2018, **265**, 727-732.
2. S. A. R. Alavi-Tabari, M. A. Khalilzadeh, H. Karimi-Maleh and D. Zareyee, *New J Chem*, 2018, **42**, 3828-3832.
3. E. Er and N. Erk, *Sens Actuators B Chem*, 2020, **320**, 128320.
4. H. Beitollahi, G. Dehghannoudeh, H. M. Moghaddam and H. Forootanfar, *J Electrochem Soc*, 2017, **164**, H812.
5. F. Bai, M. N. Kirstein, S. K. Hanna, L. C. Iacono, B. Johnston and C. F. Stewart, *J Chromatogr B*, 2003, **784**, 225-232.
6. W. J. Loos, D. M. van Zomeren, H. Gelderblom, J. Verweij, K. Nooter, G. Stoter and A. Sparreboom, *J Chromatogr B*, 2002, **766**, 99-105.
7. L. Ye, J. Shi, S. Wan, X. Yang, Y. Wang, J. Zhang, D. Zheng and Z. Liu, *Biomed Chromatogr*, 2013, **27**, 1532-1539.
8. M. Shaghghi, S. Rashtbari, A. Abdollahi, G. Dehghan and A. Jouyban, *Anal Sci*, 2020, **36**, 1345-1349.
9. F. Belal, M. Sharaf El-Din, M. M. Tolba and H. Alaa, *Luminescence*, 2015, **30**, 343-351.
10. N. Erk, *Anal Biochem*, 2003, **323**, 48-53.
11. B. Nigović and S. B. Hocevar, *Electrochim Acta*, 2013, **109**, 818-822.
12. S. Altınöz and I. Süslü, *Anal Lett*, 2005, **38**, 1389-1404.
13. B. V. Noronha, E. H. Bindewald, M. C. de Oliveira, M. A. P. Papi, M. F. Bergamini and L. H. Marcolino-Jr, *Mater Sci Eng C*, 2014, **43**, 517-520.
14. Z. Zhang, R. Ni, P. Chen, X. Zhu, Z. Zhang and J. Peng, *Microchem J*, 2021, **166**, 106259.

15. S. Cox, L. Harvill, S. Bullock, J. Smith and J. Bergman, *J Chromatogr (open)*, 2022, **2**, 100038.
